# Supplementary material for: Construction and function of a highly efficient supramolecular luminescent system
Source: Royal Society of Chemistry journal article supplement (doi:10.1039/c6fd00166a), 2016-08-09
Supplement: c6fd00166a1.pdf [file c6fd00166a1.pdf]

## Supporting information

### Construction and Function of High Efficient Supramolecular Luminescent System

Yingjie Liu, Suqian Ma, Bin Xu\* and Wenjing Tian\*

*State Key Laboratory of Supramolecular Structure and Materials, Jilin University, Qianjin Street No. 2699, Changchun 130012, China.*

**Table S1.** Summary of intermolecular interactions in C1 crystal.

| Orientation of interaction | $d(\text{Å})$ | $A(\text{deg})$ |
|----------------------------|---------------|-----------------|
| I $\pi$ - $\pi$            | 3.65          |                 |
| II $\pi$ - $\pi$           | 3.67          |                 |
| III C-H...F                | 2.72          | 120.05          |
| IV C-H...F                 | 2.65          | 121.98          |
| V C-H...F                  | 2.85          | 125.89          |
| VI C-H...F                 | 2.81          | 128.10          |
| VII C-I...N                | 3.00          | 174.27          |

**Table S2.** Summary of intermolecular interactions in C2 crystal.

| Orientation of interaction | $d(\text{Å})$ | $A(\text{deg})$ |
|----------------------------|---------------|-----------------|
| I C-H...F                  | 2.49          | 157.86          |
| II C-H...F                 | 2.92          | 143.79          |
| III C-H...F                | 2.79          | 127.68          |
| IV C-I...N                 | 2.84          | 173.03          |
| V C-H...I                  | 2.85          | 165.67          |
| VI C-H... $\pi$            | 2.77          | 147.84          |
| VII C-H... $\pi$           | 2.78          | 147.84          |

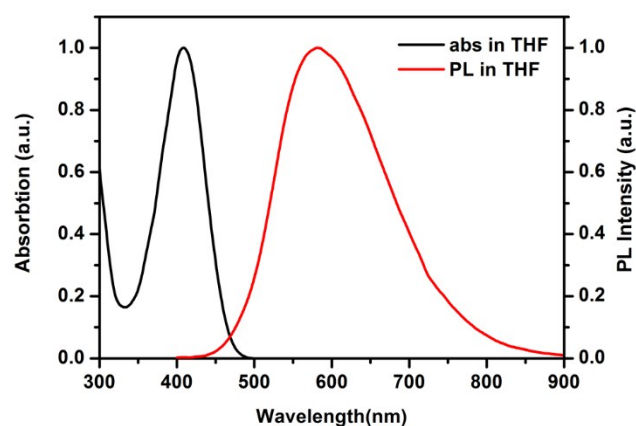

**Figure S1.** Absorption and PL spectra of BP4VA in THF.

**Table S3.** Crystal data and structure refinements of C1 and C2 crystals.

|                                                   | C1                                                              | C2                                                                           |
|---------------------------------------------------|-----------------------------------------------------------------|------------------------------------------------------------------------------|
| Sum formula                                       | C <sub>20</sub> H <sub>10</sub> F <sub>3</sub> I <sub>3</sub> N | C <sub>40</sub> H <sub>20</sub> F <sub>6</sub> I <sub>6</sub> N <sub>2</sub> |
| formula wt                                        | 701.99                                                          | 1403.98                                                                      |
| <i>T</i> , K                                      | 293(2) K                                                        | 293(2) K                                                                     |
| crystal system                                    | monoclinic                                                      | triclinic                                                                    |
| space group                                       | P 21/c                                                          | P -1                                                                         |
| <i>a</i> , Å                                      | 8.6902(17)                                                      | 5.1420(10)                                                                   |
| <i>b</i> , Å                                      | 13.870(3)                                                       | 12.724(3)                                                                    |
| <i>c</i> , Å                                      | 17.377(4)                                                       | 16.436(3)                                                                    |
| $\alpha$ ,deg                                     | 90.00                                                           | 109.15(3)                                                                    |
| $\beta$ ,deg                                      | 102.80(3)                                                       | 96.00(3)                                                                     |
| $\gamma$ ,deg                                     | 90.00                                                           | 93.79(3)                                                                     |
| <i>V</i> ,Å <sup>3</sup>                          | 2042.5(7)                                                       | 1004.5(4)                                                                    |
| <i>Z</i>                                          | 4                                                               | 1                                                                            |
| F(000)                                            | 1292                                                            | 646                                                                          |
| density, Mg/m <sup>3</sup>                        | 2.283                                                           | 2.321                                                                        |
| Absorption coefficient, mm <sup>-1</sup>          | 4.622                                                           | 4.699                                                                        |
| $\theta$ range, deg                               | 3.00 - 27.48                                                    | 3.21 - 27.48                                                                 |
| no. of reflcns collected                          | 18046                                                           | 9853                                                                         |
| no. of unique reflcns                             | 4648                                                            | 4537                                                                         |
| <i>R</i> (int)                                    | 0.0363                                                          | 0.0224                                                                       |
| Good-of-fit on F <sup>2</sup>                     | 1.035                                                           | 1.065                                                                        |
| <i>R</i> 1 [ <i>I</i> > 2 $\sigma$ ( <i>I</i> )]  | 0.0462                                                          | 0.0354                                                                       |
| <i>wR</i> 2 [ <i>I</i> > 2 $\sigma$ ( <i>I</i> )] | 0.1237                                                          | 0.0787                                                                       |
| <i>R</i> 1 (all data)                             | 0.0646                                                          | 0.0447                                                                       |
| <i>wR</i> 2 (all data)                            | 0.1414                                                          | 0.0815                                                                       |
